# Supplementary material for: High performance B2O3/MWCNTs and TiB/MWCNTs nano-adsorbents for the co-sorption of cyanide and phenol from refinery wastewater
Source: Royal Society of Chemistry journal article supplement (doi:10.1039/d4ra04313h), 2024-01-01
Supplement: d4ra04313h1.pdf [file d4ra04313h1.pdf]

### Supplementary Data

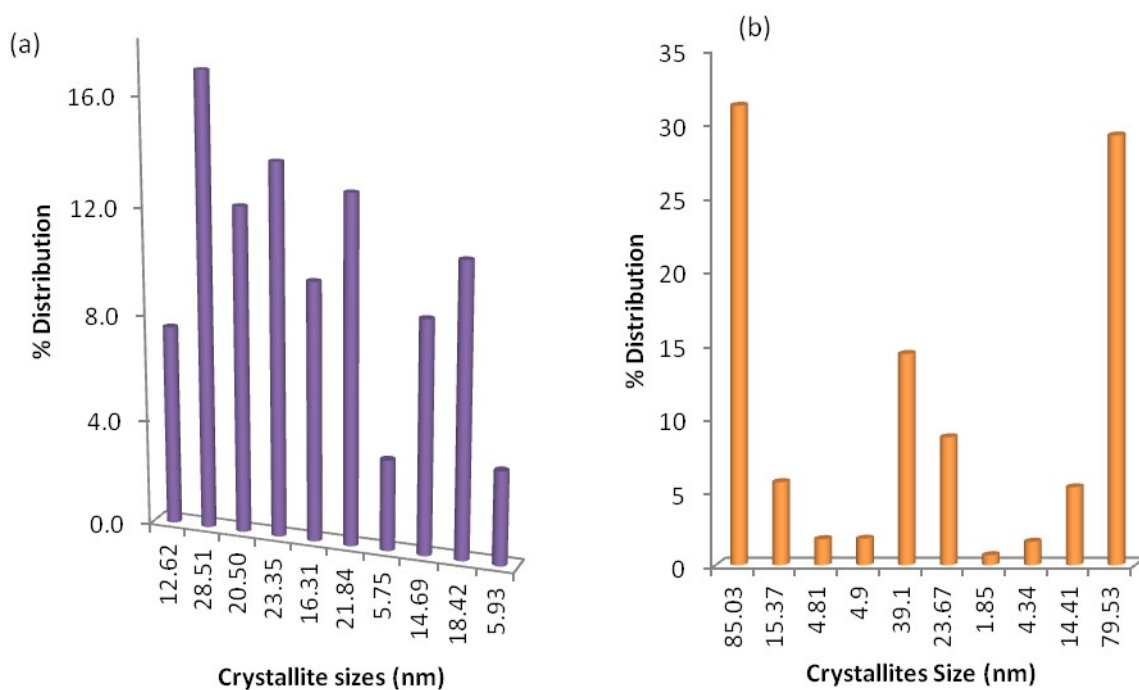

**Figure S1: Crystallite Size distribution of the developed (a) TiB/MWCNTs and (b) B<sub>2</sub>O<sub>3</sub>/MWCNTs nanoadsorbent**

**Table 1S: d-spacing and phase identification of TiB/MWCNTs nanoadsorbent**

| <b>S/N</b> | <b>Ring Diameter (nm)</b> | <b>hkl indexing</b> |
|------------|---------------------------|---------------------|
| 1          | 6.006                     | 111 (FCC)           |
| 2          | 9.838                     | 110 (BCC)           |
| 3          | 12.812                    | 100 (FCC)           |
| 4          | 16.764                    | 100 (FCC)           |

  

| <b>B<sub>2</sub>O<sub>3</sub>/MWCNTs nanoadsorbent</b> |        |           |
|--------------------------------------------------------|--------|-----------|
| 1                                                      | 4.988  | 002 (FCC) |
| 2                                                      | 8.976  | 110 (BCC) |
| 3                                                      | 11.170 | 100 (FCC) |
| 4                                                      | 15.220 | 100 (FCC) |

**Table 2S: Comparison of batch adsorption parameters, maximum adsorption capacity, isotherm and kinetic model for Phenol and Cyanide removal by different nanoadsorbents in the literature**

| Nanoadsorbent                                              | Batch Adsorption parameters |                    |             |            | Adsorptive capacity (mg/g) |                  | Isotherms | Kinetic Model       | Reference  |
|------------------------------------------------------------|-----------------------------|--------------------|-------------|------------|----------------------------|------------------|-----------|---------------------|------------|
|                                                            | pH                          | Contact time (min) | Dosage (mg) | Temp. (°C) | Pollutants Removed         |                  |           |                     |            |
| Multi-walled carbon nanotube/Titanium (IV) oxide composite | 7                           | 70                 | 300         | 40         | Phenol<br>Cyanide          | 430.00<br>509.95 | Langmuir  | Pseudo second order | [22]       |
| Multi-walled carbon nanotubes                              | 3                           | 90                 | 600         | 25         | Direct blue 71             | 3.42             | Langmuir  | Pseudo second order | [32]       |
| Functionalised multi-walled carbon nanotubes               | 3                           | 75                 | 500         | 25         | Phenol                     | 76.92            | Langmuir  | Pseudo second order | [33]       |
| Multi-walled carbon nanotubes                              | 7                           | 120                | 300         | 25         | Phenol                     | 56.90            | Langmuir  | Pseudo second order | [34]       |
| Carbon nanotubes grafted with Polyethylene glycol          | 6                           | 30                 | 20          | 25         | Phenol                     | 21.23            | Langmuir  | Pseudo second order | [35]       |
| B <sub>2</sub> O <sub>3</sub> /MWCNTs                      | 7                           | 70                 | 300         | 60         | Phenol                     | 423.45           | Langmuir  | Pseudo second order | This study |
| TiB/MWCNTs                                                 | 7                           | 70                 | 300         | 60         | Phenol                     | 434.45           | Langmuir  | Pseudo second order | This study |
| B <sub>2</sub> O <sub>3</sub> /MWCNTs                      | 7                           | 70                 | 300         | 60         | Cyanide                    | 515.51           | Langmuir  | Pseudo second order | This study |
| TiB/MWCNTs                                                 | 7                           | 70                 | 300         | 60         | Cyanide                    | 538.85           | Langmuir  | Pseudo second order | This study |
